# Supplementary material for: Comparative study on anatomical traits and gas exchange responses due to belowground hypoxic stress and thermal stress in three tropical seagrasses
Source: PeerJ. 2022 Feb 9;10:e12899. doi: 10.7717/peerj.12899 (PMC8840093; doi:10.7717/peerj.12899)
Supplement: Supplemental Information 1 [file peerj-10-12899-s001.xlsx]

## Sheet: Table 1
Root anatomy parameters
Species	Replication	Root thickness (µm)	Epidermal layer thickness (µm)	Total cortex thickness (µm)	Outer cortex thickness (µm)	Middle cortex thickness (µm)	Inner cortex thickness (µm)	Ratio of outer: middle: inner cortex	Air lacuna shape	Air lacuna numbers	Stele diameter (µm)	Ratio of cortex and stele thickness	Tannin cells in root
Cymodocea rotundata	1	772.208	6.843	350.061	91.95	69.374	188.737	03:02:05	Irregular ovoid	26	45.241	0.129237	Present
	2	681.39	6.586	299.532	63.748	79.939	155.845	02:03:05	Irregular ovoid	30	41.068	0.137107	Present
	3	652.308	5.594	351.421	150.381	84.875	116.165	04:02:04	Irregular ovoid	27	42.646	0.121353	Present
Thalassia hemprichii	1	732.777	19.524	286.816	60.464	74.444	151.908	02:03:05	Retangular	31	50.247	0.175189	Present
	2	675.051	19.418	290.294	72.035	82.701	135.558	02:03:05	Retangular	34	47.775	0.164575	Present
	3	664.748	15.601	319.224	61.13	75.656	182.438	02:02:06	Retangular	34	54.535	0.170836	Present
Halophila ovalis	1	339.26	14.807	145.401	40.729	51.111	53.561	03:04:04	Round	9	27.676	0.190343	Absent
	2	341.528	9.455	164.231	52.472	54.055	57.704	03:03:04	Round	9	20.851	0.126961	Absent
	3	321.046	8.087	129.726	36.614	40.317	52.795	03:03:04	Round	11	23.049	0.177674	Absent
Rhizome anatomy parameters
Species	Replication	Rhizome thickness (µm)	Epidermal layer thickness (µm)	Total cortex thickness (µm)	Outer cortex thickness (µm)	Middle cortex thickness (µm)	Inner cortex thickness (µm)	Ratio of outer: middle: inner cortex	Air lacuna shape	Air lacuna numbers	Stele diameter (µm)	Ratio of stele diameter and cortex thickness	Rhizome porosity (%)	Tannin cells in rhizome
Cymodocea rotundata	1	2087.4	29.345	964.541	361.686	491.017	111.838	0.17015	Round to ovoid	82	183.447	0.190191	35.1779	Present
	2	1458.35	22.261	570.898	200.289	271.573	99.036	0.128495		118	159.588	0.279539	39.163	Present
	3	1121.52	18.395	536.846	237.174	246.798	52.874	0.17015		100	99.262	0.184898	22.1391	Present
Thalassia hemprichii	1	4748.84	36.632	960.198	236.511	607.028	116.659	0.0875116	Round to ovoid	146	243.312	0.253398	40.8069	Present
	2	5447.55	24.592	751.005	240.743	374.396	135.866	0.128495		106	219.101	0.291744	29.1303	Present
	3	4627.52	26.363	666.657	217.671	302.921	146.065	0.128495		124	164.962	0.247447	21.3768	Present
Halophila ovalis	1	1414.05	22.293	560.635	83.103	381.653	95.879	0.0465509	Round	18	142.651	0.254445	51.9971	Absent
	2	1135.94	12.806	523.935	107.517	331.21	85.208	0.0875231		18	106.642	0.203541	46.3725	Absent
	3	988.032	17.333	495.276	120.416	277.308	97.552	0.0875231		18	102.956	0.207876	35.4461	Absent
Leaf anatomy parameters
Species	Replication	Lamina thickness (µm)	Adaxially epidermal layer thickness (µm)	Abaxially epidermal layer thickness (µm)	Mesophyll thickness (µm)	Number of cell layer in mesophyll	Vascular bundle numbers	Position of air lacunae	Air lacuna numbers	Leaf porosity (%)	Tannin cells in leaf
Cymodocea rotundata	1	190.208	14.074	18.815	153.292	6	12	Mesophyll	67	59.2712	Present
	2	149.997	15.365	13.469	159.783	6	13	Mesophyll	64	71.4291	Present
	3	171.73	13.721	14.654	113.591	6	13	Mesophyll	75	62.1049	Present
Thalassia hemprichii	1	169.696	7.084	13.052	114.751	5	10	Mesophyll	34	64.1188	Present
	2	173.127	7.626	14.138	110.547	6	9	Mesophyll	38	63.3595	Present
	3	174.147	13.04	12.497	111.518	6	10	Mesophyll	35	58.427	Present
Halophila ovalis	1	39.629	20.667	18.962	0	0	1	Midvien	4	10.4856	Absent
	2	32.75	16	16.75	0	0	1	Midvien	5	14.2588	Absent
	3	33.763	17.013	16.75	0	0	1	Midvien	5	13.5534	Absent

## Sheet: Table 2
Root porosity and root diameter at the apical, middle and basal parts
Species	Root zone	Replication	% air space	Diameter (µm)
Cymodocea rotundata	Apical	1	7.11181	284.769
		2	7.24817	347.246
		3	4.71013	319.312
		4	4.78087	319.082
		5	1.41691	370.256
	Middle	1	11.12	283.534
		2	10.4112	369.111
		3	8.84448	412.145
		4	12.7278	266.477
		5	18.9731	516.187
	Basal	1	9.31173	410.444
		2	16.2602	523.193
		3	12.7239	424.509
		4	18.7828	413.769
		5	9.69352	431.716
Thalassia hemprichii	Apical	1	2.12464	450.361
		2	1.4527	340.355
		3	1.32556	662.381
		4	1.08763	641.941
		5	1.78246	479.038
	Middle	1	16.5694	552.323
		2	20.3644	429.53
		3	23.6885	370.885
		4	19.6303	718.197
		5	21.6044	419.495
	Basal	1	22.0957	443.29
		2	33.1103	531.438
		3	29.5271	448.25
		4	29.458	533.403
		5	24.6145	575.155
Halophila ovalis	Apical	1	0.718548	220.367
		2	2.93005	215.855
		3	0.375954	235.707
		4	0.374142	234.356
		5	0.349508	175.854
	Middle	1	18.3412	356.734
		2	15.3862	272.457
		3	15.4231	240.857
		4	17.234	328.202
		5	14.5491	324.072
	Basal	1	20.2569	432.35
		2	18.3032	299.946
		3	17.1301	349.762
		4	18.8245	426.279
		5	16.0675	365.327

## Sheet: Figure 5
A. Oxygen release in belowground tissues					B. Dissolved inorganic carbon release in belowground tissues						C. Oxygen release in aboveground tissues					D. Dissolved inorganic carbon uptake in aboveground tissues
Species	Replication	Normoxia	Hypoxia		Species	Replication	Normoxia	Hypoxia			Species	Replication	Normoxia	Hypoxia		Species	Replication	Normoxia	Hypoxia
Cymodocea rotundata	1	0.0397015	0.440896		Cymodocea rotundata	1	32.0895	46.2893			Cymodocea rotundata	1	0.536467	3.60896		Cymodocea rotundata	1	46.1349	350.244
	2	0.323224	0.0784153			2	30.8952	33.3724				2	4.65106	5.50474			2	234.066	92.8189
	3	0.0277752	0.214067			3	54.7199	9.94772				3	3.21638	4.56164			3	253.903	180.175
	4	0.0196721	0.135934			4	24.2466	60.0187				4	3.07658	4.94619			4	141.361	35.1529
	5	0.0639004	0.238755			5	2.22375	20.9506				5	4.45062	3.33114			5	15.4842	42.9942
	6	0.0574408	0.197453			6	13.8511	43.0597				6	5.01946	8.74431			6	41.4687	73.8411
	7	0.0378378	0.195495			7	20.1377	22.4446				7	14.2193	2.46123			7	35.1783	340.356
	8	0.0438261	0.112304			8	22.6234	40.6201				8	9.5674	3.39578			8	3.08322	185.505
	9	0.0751118	0.085544			9	18.5356	3.71175				9	2.02618	1.37419			9	109.514	20.4244
	10	0.064695	0.220739			10	34.6192	29.0633				10	7.74367	11.0353			10	121.739	13.9087
	11	0.0453333	0.165333			11	45.911	39.1279				11	4.12372	9.622			11	28.3202	130.547
	12	0.0985475	0.849385			12	16.7195	58.6763				12	10.2264	11.2369			12	276.404	122.517
Thalassia hemprichii	1	0.0527799	0.180731		Thalassia hemprichii	1	39.2315	9.21367			Thalassia hemprichii	1	2.0832	3.37622		Thalassia hemprichii	1	232.335	552.178
	2	0.0322975	0.04004			2	3.72035	60.2542				2	5.80622	9.16211			2	343.845	308.822
	3	0.00867769	0.304413			3	2.26639	3.67754				3	9.96642	9.06038			3	596.015	182.949
	4	0.00785302	2.09288			4	2.3679	26.7715				4	5.62057	7.87681			4	278.392	510.949
	5	0.1906	0.15316			5	21.2387	12.0045				5	16.986	7.59468			5	642.394	300.601
	6	0.0465337	0.0538462			6	-0.100962	42.4016				6	8.30022	10.5531			6	613.535	313.577
	7	0.112632	0.113987			7	9.93817	14.0448				7	1.99787	2.48915			7	52.2434	294.747
	8	0.21913	0.243049			8	102.364	38.6859				8	7.36795	2.43618			8	436.714	35.8296
	9	0.0488952	0.0878118			9	19.2877	17.1101				9	12.9358	5.42469			9	222.836	178.578
	10	0.0183406	0.0508297			10	15.6691	23.6265				10	7.51666	5.1449			10	318.851	170.069
	11	0.0866891	0.089166			11	6.49704	13.191				11	11.9505	11.7628			11	275.855	281.455
	12	0.657391	0.289856			12	47.6256	9.25399				12	6.37753	8.24984			12	484.283	139.435
Halophila ovalis	1	0.243799	2.50449		Halophila ovalis	1	252.406	110.718			Halophila ovalis	1	5.19742	11.1493		Halophila ovalis	1	37.587	56.7839
	2	1.4522	2.45933			2	69.2075	296.043				2	2.18454	7.30002			2	44.4558	297.753
	3	0.448	1.928			3	3.217	219.007				3	5.25128	7.55321			3	715.486	908.363
	4	2.016	3.0384			4	319.377	1204.55				4	3.5227	7.93528			4	374.232	844.906
	5	0.375497	1.53119			5	217.369	203.776				5	8.42045	11.0795			5	832.499	687.116
	6	0.195349	0.49814			6	147.062	69.731				6	6.73716	10.2199			6	199.91	572.074
	7	0.40678	1.04746			7	28.3246	76.8953				7	1.96005	16.8089			7	345.103	794.459
	8	0.669027	1.04746			8	774.08	510.667				8	4.81967	5.61095			8	95.2783	266.763
	9	0.547436	2.77846			9	128.783	118.335				9	8.44646	4.88726			9	203.87	203.485
	10	0.150336	1.11812			10	223.402	153.692				10	8.63224	6.55603			10	109.226	429.188
	11	0.944295	2.66235			11	142.293	389.946				11	5.5985	2.53799			11	83.1937	578.138
	12	0.146087	1.80965			12	274.149	321.319				12	6.26135	10.0689			12	110.018	762.933

## Sheet: Figure 6 
A. Oxygen release in belowground tissues				B. Dissolved inorganic carbon release in belowground tissues				C. Oxygen exchange in aboveground tissues				D. Dissolved inorganic carbon exchange rates in aboveground tissues
Treatment	Replication	O2 release in BG (mg O2-1mg DW-1h-1)		Treatment	Replication	Net DIC release (µmol-1mg-1h)		Treatment	Replication	O2 uptake in AG (mg O2-1mg DW-1h-1)		Treatment	Replication	Net DIC release (µmol-1mg-1h)
Cymodocea rotundata-Dark-30°C	1	0.236347		Cymodocea rotundata-Dark-30°C	1	78.0695		Cymodocea rotundata-Dark-30°C	1	0.852538		Cymodocea rotundata-Dark-30°C	1	73.5954
	2	0.566929			2	63.1618			2	1.21006			2	51.7073
	3	0.0563758			3	44.6805			3	1.38752			3	126.481
	4	0.218336			4	30.3852			4	1.32808			4	133.56
	5	0.355185			5	16.7202			5	1.60895			5	37.4687
	6	0.372152			6	79.0948			6	0.235411			6	63.7358
	7	0.314019			7	91.526			7	2.73594			7	59.1103
	8	0.181069			8	16.9506			8	3.39635			8	37.0827
	9	0.351892			9	28.1078			9	2.86979			9	36.2086
Cymodocea rotundata-Dark-40°C	1	0.0464945			10	22.8262		Cymodocea rotundata-Dark-40°C	1	2.96683		Cymodocea rotundata-Dark-40°C	1	54.9589
	2	0.56315		Cymodocea rotundata-Dark-40°C	1	6.89571			2	3.28771			2	33.5649
	3	0.0782215			2	7.76516			3	2.2827			3	36.2591
	4	0.0635161			3	0			4	3.19723			4	39.8472
	5	0.204167			4	7.53922			5	2.55708			5	184.678
	6	0.0817916			5	15.4219			6	3.2369			6	80.5222
	7	0.178063			6	2.903			7	3.33702			7	84.9668
	8	0.332488			7	10.4226			8	3.11196			8	106.951
	9	0.185878			8	5.42529			9	1.86931			9	117.535
	10	0.249356			9	-0.403922			10	1.3175			10	52.104
Thalassia hemprichii-Dark-30°C	1	0.132012			10	11.0084		Thalassia hemprichii-Dark-30°C	1	0.284952		Thalassia hemprichii-Dark-30°C	1	171.241
	2	0.566929		Thalassia hemprichii-Dark-30°C	1	14.4397			2	0.557351			2	61.407
	3	0.154244			2	20.731			3	1.98605			3	179.942
	4	0.110394			3	27.129			4	0.84759			4	60.5549
	5	0.275457			4	14.0746			5	1.26525			5	121.232
	6	0.123657			5	7.41646			6	0.520421			6	106.598
	7	0.116509			6	14.2375			7	4.9148			7	64.5668
	8	0.731157			7	13.729			8	2.51677			8	36.7694
	9	0.00198519			8	14.1471			9	2.25693			9	40.8684
	10	0.107753			9	16.1999			10	3.03973		Thalassia hemprichii-Dark-40°C	1	123.425
Thalassia hemprichii-Dark-40°C	1	0.009815			10	7.18386		Thalassia hemprichii-Dark-40°C	1	2.80881			2	42.2685
	2	0.176138		Thalassia hemprichii-Dark-40°C	1	29.4495			2	2.4589			3	16.2368
	3	0.230102			2	-2.20083			3	2.56265			4	6.92939
	4	0.0153047			3	-2.42428			4	4.5499			5	173.538
	5	0.191956			4	12.4637			5	2.41081			6	20.8931
	6	0.0379649			5	2.09243			6	0.130105			7	44.1885
	7	0.0454668			6	15.8299			7	1.75253			8	65.4156
	8	0.870747			7	16.8417			8	3.6861			9	27.9175
	9	0.00813928			8	12.7041			9	3.15458			10	34.5486
	10	0.0835292			9	6.53947			10	3.17047		Halophila ovalis-Dark-30°C	1	40.2472
Halophila ovalis-Dark-30°C	1	1.96977			10			Halophila ovalis-Dark-30°C	1	0.295799			2	70.6767
	2	1.77917		Halophila ovalis-Dark-30°C	1	201.86			2	1.72909			3	319.433
	3	1.19512			2	238.583			3	4.12925			4	276.859
	4	2.68902			3	44.9295			4	8.35595			5	31.473
	5	6.9496			4	142.349			5	4.41296			6	128.543
	6	0.954286			5	77.112			6	0.817742			7	127.53
	7	1.09714			6	258.697			7	11.7732			8	6.21632
	8	2.58349			7	175.171			8	8.49856			9	476.9
	9	0.553846			8	16.1327			9	2.91379			10	194.048
	10	1.76372			9	143.677			10	3.70328		Halophila ovalis-Dark-40°C	1	140.384
Halophila ovalis-Dark-40°C	1	0.0488372			10	332.983		Halophila ovalis-Dark-40°C	1	0.665548			2	44.8158
	2	2.07083		Halophila ovalis-Dark-40°C	1	37.8814			2	2.63123			3	54.178
	3	1.13707			2	-14.8878			3	4.57808			4	207.596
	4	2.36634			3	15.177			4	0.971347			5	121.3
	5	3.0128			4	69.363			5	4.29038			6	305.149
	6	0.557143			5	18.0738			6	0.408871			7	368.896
	7	0.385143			6	25.8526			7	0.500988				Net DIC uptake in AG (mg O2-1mg DW-1h-1)
	8	1.67756			7	28.6331			8	2.27354		Cymodocea rotundata-Light-30°C	1	89.1457
	9	1.40462			8	35.5207			9	5.0182			2	201.201
	10	1.24744			9	27.853			10	6.35846			3	180.361
Cymodocea rotundata-Light-30°C	1	0.373506			10					O2 release in AG (mg O2-1mg DW-1h-1)			4	90.4001
	2	1.48819		Cymodocea rotundata-Light-30°C	1	101.97		Cymodocea rotundata-Light-30°C	1	3.41015			5	60.8856
	3	0.581728			2	36.0207			2	6.43844			6	108.963
	4	0.439584			3	46.5035			3	7.40759			7	164.266
	5	0.62125			4	24.7398			4	4.52531			8	305.717
	6	0.474391			5	19.0811			5	2.78693			9	159.425
	7	1.03483			6	23.7935			6	4.53165		Cymodocea rotundata-Light-40°C	1	137.672
	8	0.436984			7	98.2913			7	4.04173			2	140.299
	9	0.286622			8	31.0741			8	6.76909			3	107.852
	10	0.681974			9	24.8579			9	3.68596			4	118.525
Cymodocea rotundata-Light-40°C	1	0.193727			10	18.791			10	3.92938			5	-38.4838
	2	0.0944882		Cymodocea rotundata-Light-40°C	1	140.112		Cymodocea rotundata-Light-40°C	1	3.13734			6	161.411
	3	0.253691			2	0			2	2.92241			7	397.097
	4	0.241626			3	17.1347			3	3.08836			8	77.651
	5	0.290046			4	4.83748			4	11.7115			9	85.3352
	6	0.253554			5	32.798			5	0.71828			10	221.507
	7	0.66729			6	-8.27421			6	4.70821		Thalassia hemprcichii-Light-30°C	1	145.992
	8	0.400137			7	18.1786			7	6.69477			2	132.609
	9	0.385946			8	2.95813			8	0.908602			3	339.423
	10	0.718026			9	-0.992477			9	2.05361			4	122.762
Thalassia hemprichii-Light-30°C	1	0.229017							10	4.96951			5	178.242
	2	0.606242		Thalassia hemprichii-Light-30°C	1	7.63944		Thalassia hemprichii-Light-30°C	1	4.9663			6	255.179
	3	0.266767			2	48.4499			2	3.60639			7	400.722
	4	0.262186			3	38.4296			3	8.64894			8	141.79
	5	0.379113			4	7.3776			4	2.47442			9	201.698
	6	0.220413			5	11.1896			5	3.26571		Thalassia hemprcichii-Light-40°C	1	57.3109
	7	0.107984			6	2.80239			6	15.6126			2	167.666
	8	2.73031			7	37.886			7	5.43583			3	20.7414
	9	0.0850323			8	16.1237			8	8.22058			4	8.85185
	10	0.151416			9	11.7048			9	5.79621			5	53.9322
Thalassia hemprichii-Light-40°C	1	0.05889			10				10	8.04057			6	55.2188
	2	0.0546164		Thalassia hemprichii-Light-40°C	1	7.03735		Thalassia hemprichii-Light-40°C	1	3.37871			7	125.534
	3	0.182059			2	0.41406			2	1.40977			8	-53.5742
	4	0.0697491			3	6.62682			3	2.30638			9	72.286
	5	0.203857			4	12.4622			4	3.19723		Halophila ovalis-Light-30°C	1	40.3211
	6	0.0216942			5	-8.03384			5	0.376155			2	195.66
	7	0.0568336			6	17.8017			6	6.50527			3	555.451
	8	0.405857			7	14.3457			7	0.3713			4	46.4868
	9	0.0211754			8	6.80888			8	0.672859			5	376.281
	10	0.130837			9	14.6091			9	0.871997			6	172.627
Halophila ovalis-Light-30°C	1	3.00349			10	-21.9845			10	7.61567			7	305.016
	2	1.73542		Halophila ovalis-Light-30°C	1	263.129		Halophila ovalis-Light-30°C	1	4.58489			8	558.93
	3	2.72033			2	58.6651			2	5.18728			9	272.26
	4	6.17963			3	66.1144			3	12.8366			10	433.497
	5	7.7252			4	7.93212			4	0.434075		Halophila ovalis-Light-40°C	1	10.7412
	6	2.58571			5	7.93212			5	10.4195			2	261.074
	7	1.24			6	249.758			6	9.8129			3	157.562
	8	7.24744			7	52.0516			7	45.5899			4	-190.478
	9	4.03077			8	57.6447			8	10.8458			5	-173.193
	10	10.4763			9	112.123			9	6.71791			6	319.241
Halophila ovalis-Light-40°C	1	0.944186			10	71.771			10	6.7777			7	310.363
	2	1.69167		Halophila ovalis-Light-40°C	1	138.934		Halophila ovalis-Light-40°C	1	4.73279			8	582.886
	3	1.2748			2	-17.7224			2	0.526246			9	69.8106
	4	2.88878			3	15.8283			3	1.97486
	5	4.55			4	-86.164			4	0.755492
	6	1.34286			5	-108.542			5	2.45164
	7	0.525143			6	37.3137			6	2.28968
	8	3.85814			7	10.7774			7	6.76334
	9	2.35385			8	-86.2761			8	4.97337
	10	4.29767			9	-45.5665			9	0.323755
									10	2.16607

## Sheet: Table 3
Species	Replication	Normoxia	Hypoxia		Species	Temperature	ETR
Cymodocea rotundata	1	116.1	110.989		Cymodocea rotundata	30	61.3286
	2	104.625	97.2964			30	77.9143
	3	80.9036	99.225			30	95.6571
	4	90.0643	116.23			30	83.2179
	5	77.5286	116.548			30	105.782
	6	90.7393	103.198			30	96.0429
Thalassia hemprichii	1	94.6155	80.8071			30	89.4857
	2	106.164	72.1286			30	96.7179
	3	78.8286	71.7429			30	86.9786
	4	107.754	60.3333			30	76.5643
	5	81.9012	46.4			30	124.296
	6	85.1857	49.4667			30	85.725
Halophila ovalis	1	56.6	52.3405			40	68.9464
	2	45.2	82.6429			40	69.0429
	3	38	91.8607			40	54.675
	4	61.0667	43.8667			40	45.3214
	5	55.0667	40.1333			40	77.2393
	6	35.9333	36.2			40	64.125
						40	57.9536
						40	72.0321
						40	60.6536
						40	55.2536
						40	59.9786
						40	57.9536
					Thalassia hemprichii	30	92.7083
						30	97.794
						30	82.325
						30	133.924
						30	114.005
						30	108.495
						30	99.8071
						30	113.687
						30	93.6619
						30	135.619
						30	93.45
						30	103.833
						40	42.4869
						40	49.056
						40	37.4012
						40	90.8012
						40	49.4798
						40	80.8417
						40	51.281
						40	48.7381
						40	53.8238
						40	50.4333
						40	76.1798
						40	51.175
					Halophila ovalis	30	44.8
						30	46.4
						30	45.2667
						30	81.6
						30	65.4667
						30	72.5333
						30	51.2
						30	56.0667
						30	51.8667
						30	48.2667
						30	63.7333
						30	52.4667
						40	53.6667
						40	31.0667
						40	38.7333
						40	12.3333
						40	9.53333
						40	13.2667
						40	36.2
						40	29.9333
						40	48.4
						40	59.2667
						40	54
						40	53.9333

## Sheet: Negative control
Parameter	Replication	Normoxia	Hypoxia				Temp	Parameter	Replication		Temp	Parameter	Replication
pH change in belowground	1	-0.008	-0.035				30°C	pH change in belowground-Dark	1	0	30°C	pH change in belowground-Light	1	0.024
	2	-0.023	-0.017						2	0.002			2	0.013
	3	-0.015	-0.077						3	-0.022			3	-0.028
	4	-0.001	-0.044						4	0.009			4	-0.004
	5	-0.008	-0.073						5	-0.02			5	-0.002
	6	-0.015	-0.03						6	0.006			6	-0.053
	7	-0.01	-0.05						7	-0.026			7	-0.005
	8	-0.05	-0.04						8	-0.029			8	-0.034
	9	-0.02	0.04						9	-0.006			9	-0.018
	10	-0.03	-0.03						10	0.003			10	-0.027
	11	-0.05	0.04					Dissolved inorganic carbon release rate (µmol h-1) in belowground-Dark	1	0		Dissolved inorganic carbon release rate (µmol h-1) in belowground-Light	1	-1.14107
	12	-0.07	-0.107						2	-0.0868562			2	-0.623269
Dissolved inorganic carbon release rate (µmol h-1) in belowground	1	0.300798	1.51774						3	1.03829			3	1.30756
	2	0.903903	0.740284						4	-0.422256			4	0.187769
	3	0.59377	3.37742						5	0.908619			5	0.0940875
	4	0.0375648	1.96175						6	-0.277063			6	2.53882
	5	0.311978	3.25573						7	1.23354			7	0.234975
	6	0.59377	1.33707						8	1.35338			8	1.62102
	7	0.376878	2.15791						9	0.253419			9	0.774719
	8	1.91502	1.77287						10	-0.138775			10	1.1297
	9	0.6981	-1.72971					DO change in belowground-Dark	1	0.04		DO change in belowground-Light	1	-0.05
	10	1.09212	1.28984						2	0.55			2	0.75
	11	1.75347	-1.7087						3	0.04			3	0.17
	12	2.65922	4.76413						4	0.94			4	0.78
DO change in belowground	1	0	-0.04						5	1.05			5	0.06
	2	-0.07	0.061						6	0.46			6	0.1
	3	0	0.016						7	0.6			7	0.05
	4	-0.03	0.02						8	-0.04			8	0.03
	5	-0.13	0.25						9	0.017			9	0.016
	6	-0.04	-0.25						10	-0.02			10	0.06
	7	0.06	-0.1					DO uptake rates (mg h-1) in belowground-Dark	1	0.0026		DO uptake rates (mg h-1) in belowground-Light	1	-0.00325
	8	0.05	0						2	0.03575			2	0.04875
	9	0.13	0.03						3	0.0026			3	0.01105
	10	-0.08	0.12						4	0.0611			4	0.0507
	11	-0.05	-0.05						5	0.06825			5	0.0039
	12	0.12	-0.18						6	0.0299			6	0.0065
DO uptake rates (mg h-1) in belowground	1	0	-0.0026						7	0.039			7	0.00325
	2	-0.00455	0.003965						8	-0.0026			8	0.00195
	3	0	0.00104						9	0.001105			9	0.00104
	4	-0.00195	0.0013						10	-0.0013			10	0.0039
	5	-0.00845	0.01625				40°C	pH change in belowground-Dark	1	0.049	40°C	pH change in belowground-Light	1	-0.045
	6	-0.0026	-0.01625						2	0.019			2	-0.001
	7	0.0039	-0.0065						3	-0.071			3	0.009
	8	0.00325	0						4	0.054			4	0.002
	9	0.00845	0.00195						5	-0.004			5	-0.053
	10	-0.0052	0.0078						6	0.01			6	-0.069
	11	-0.00325	-0.00325						7	0.082			7	-0.006
	12	0.0078	-0.0117						8	-0.037			8	-0.032
pH change in aboveground	1	-0.009	0.008						9	0.043			9	0.037
	2	0.04	-0.031						10	0.002			10	0.027
	3	0.003	-0.014					Dissolved inorganic carbon release rate (µmol h-1) in belowground-Dark	1	-2.4505		Dissolved inorganic carbon release rate (µmol h-1) in belowground-Light	1	-18.2606
	4	-0.017	-0.016						2	-0.933238			2	-0.590021
	5	-0.038	-0.066						3	3.51942			3	4.79543
	6	-0.045	0.02						4	2.49665			4	1.26232
	7	-0.03	-0.01						5	0.188581			5	-29.3586
	8	-0.03	0						6	-0.455163			6	-27.1059
	9	0.03	-0.04						7	-3.96427			7	-3.38359
	10	0.04	0.02						8	1.85274			8	-21.897
	11	-0.03	-0.04						9	2.14053			9	21.589
	12	-0.05	0.04						10	-0.0988			10	15.4559
Dissolved inorganic carbon uptake rate (µmol h-1) in aboveground	1	-4.14495	3.90125					DO change in belowground-Dark	1	0.35		DO change in belowground-Light	1	0.09
	2	21.1756	-13.6009						2	-0.08			2	0.03
	3	1.34138	-6.20224						3	0.02			3	0.03
	4	-8.00685	-7.44075						4	0.06			4	0.05
	5	-18.4624	-29.373						5	0.15			5	-0.04
	6	-21.1756	9.42348						6	0.38			6	0.08
	7	-13.8453	-4.6931						7	0.29			7	-0.04
	8	-13.4877	0						8	0.1			8	0.49
	9	14.303	-17.4082						9	0.14			9	-0.17
	10	17.4082	8.53705						10	0.08			10	0.07
	11	-13.4877	-18.8456					DO uptake rates (mg h-1) in belowground-Dark	1	0.02275		DO uptake rates (mg h-1) in belowground-Light	1	0.0722475
	12	-20.6046	18.8456						2	-0.0052			2	0.0240825
DO change in aboveground	1	0.08	0.03						3	0.0013			3	0.0240825
	2	0.01	0.31						4	0.0039			4	0.0401375
	3	-0.02	0.04						5	0.00975			5	-0.03211
	4	0.08	0.13						6	0.0247			6	0.06422
	5	0.1	-0.04						7	0.01885			7	-0.03211
	6	0.13	0.07						8	0.0065			8	0.393348
	7	-0.05	-0.05						9	0.0091			9	-0.136467
	8	0.05	0.13						10	0.0052			10	0.0561925
	9	0.08	0.09				30°C	pH change in aboveground-Dark	1	-0.003	30°C	pH change in aboveground-Light	1	-0.002
	10	0.04	-0.04						2	-0.002			2	-0.017
	11	-0.07	0.01						3	-0.002			3	-0.035
	12	0.1	-0.13						4	-0.016			4	-0.015
DO release rates (mg h-1) in aboveground	1	0.06422	0.0240825						5	-0.021			5	0.004
	2	0.0080275	0.248852						6	-0.001			6	0
	3	-0.016055	0.03211						7	-0.011			7	-0.012
	4	0.06422	0.104358						8	0.01			8	-0.019
	5	0.080275	-0.03211						9	0.002			9	-0.012
	6	0.104357	0.0561925						10	-0.005			10	-0.009
	7	-0.0401375	-0.0401375					Dissolved inorganic carbon release rate (µmol h-1) in aboveground-Dark	1	1.62256		Dissolved inorganic carbon release rate (µmol h-1) in aboveground-Light	1	-1.0807
	8	0.0401375	0.104357						2	1.10378			2	-9.1945
	9	0.06422	0.0722475						3	1.0797			3	-18.7362
	10	0.03211	-0.03211						4	5.3132			4	-7.96428
	11	-0.0561925	0.0080275						5	13.6086			5	2.044
	12	0.080275	-0.104357						6	0.530818			6	0
									7	6.30058			7	-6.84645
									8	-5.71157			8	-10.8371
									9	-1.03254			9	-6.09388
									10	3.24311			10	-4.60477
								DO change in aboveground-Dark	1	-0.01		DO change in aboveground-Light	1	-0.03
									2	0			2	0.01
									3	0.03			3	0.04
									4	0.03			4	0.32
									5	0.25			5	-0.05
									6	0.04			6	-0.04
									7	0.13			7	0.01
									8	0.11			8	-0.05
									9	0.06			9	0.07
									10	0.11			10	0
								DO uptake rates (mg h-1) in aboveground-Dark	1	-0.0080275		DO uptake rates (mg h-1) in aboveground-Light	1	-0.0240825
									2	0			2	0.0080275
									3	0.0240825			3	0.03211
									4	0.0240825			4	0.25688
									5	0.200687			5	-0.0401375
									6	0.03211			6	-0.03211
									7	0.104357			7	0.0080275
									8	0.0883025			8	-0.0401375
									9	0.048165			9	0.0561925
									10	0.0883025			10	0
							40°C	pH change in aboveground-Dark	1	0.026	40°C	pH change in aboveground-Light	1	-0.045
									2	0.014			2	-0.001
									3	0.009			3	0.009
									4	0			4	0.002
									5	0.007			5	-0.053
									6	0			6	-0.069
									7	0.037			7	-0.006
									8	-0.046			8	-0.032
									9	0.018			9	0.037
									10	0			10	0.027
								Dissolved inorganic carbon release rate (µmol h-1) in aboveground-Dark	1	-14.5519		Dissolved inorganic carbon uptake rate (µmol h-1) in aboveground-Light	1	-18.2606
									2	-8.40881			2	-0.590021
									3	-5.68949			3	4.79543
									4	0			4	1.26232
									5	-3.68763			5	-29.3586
									6	0			6	-27.1059
									7	-19.7477			7	-3.38359
									8	25.5887			8	-21.897
									9	-10.1427			9	21.589
									10	0			10	15.4559
								DO change in aboveground-Dark	1	-0.12		DO change in aboveground-Light	1	0.09
									2	-0.04			2	0.03
									3	-0.05			3	0.03
									4	0.24			4	0.05
									5	0.28			5	-0.04
									6	0.24			6	0.08
									7	0.28			7	-0.04
									8	0.16			8	0.49
									9	-0.06			9	-0.17
									10	0.08			10	0.07
								DO uptake rates (mg h-1) in aboveground-Dark	1	-0.09633		DO release rates (mg h-1) in aboveground-Light	1	0.0722475
									2	-0.03211			2	0.0240825
									3	-0.0401375			3	0.0240825
									4	0.19266			4	0.0401375
									5	0.22477			5	-0.03211
									6	0.19266			6	0.06422
									7	0.22477			7	-0.03211
									8	0.12844			8	0.393348
									9	-0.048165			9	-0.136467
									10	0.06422			10	0.0561925
